# Supplementary material for: Effect of Dry Heating on Some Physicochemical Properties of Protein-Coated High Amylose and Waxy Corn Starch
Source: MDPI journal article supplement (doi:10.3390/foods12061350), 2023-03-22
Supplement: s1 [file s1]

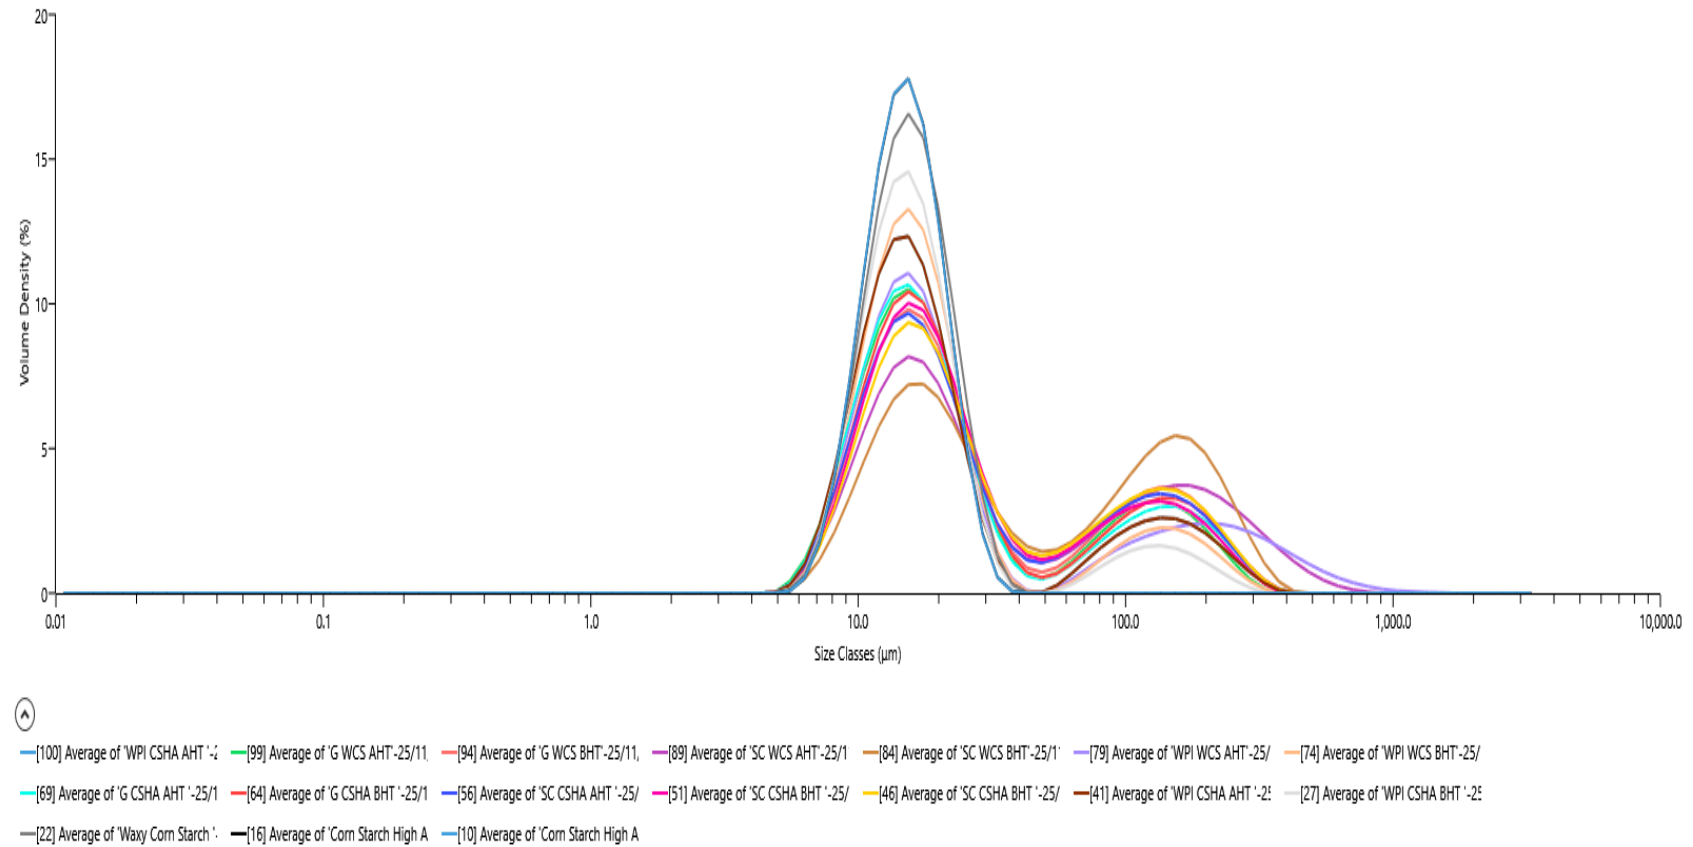

**Figure S1.** Particle size distribution of different types of starch-protein combinations obtained by a Mastersizer.
